# Supplementary material
Source: Research Square preprint supplement (doi:10.21203/rs.3.rs-9245436/v1)
Supplement: Supplementary file 1 [file 9cd9964fed190794a59fa93f.docx]

Table S1 The Infection Sites and Pathogens in MDA5+ DM Patients

| *Infections site* |  |
| --- | --- |
| Pulmonary infections, n (%) | 87 (86.1) |
| Skin and soft tissue infections, n (%) | 14 (13.8) |
| Bacteremia, n (%) | 6 (5.9) |
| Urinary tract infections, n (%) | 5 (4.9) |
| Digestive system infections, n (%) | 3 (2.9) |
| Joint infection, n (%) | 1 (0.9) |
| Multi-site infections, n (%) | 18 (17.8) |
| *Pathogens* |  |
| Bacterial infection, n (%) | 40 (30.9) |
| fungal infection, n (%) | 27 (26.7) |
| Viral infection, n (%) | 10 (9.9) |

Table S2 The Calculated Betas of the Six Underlying Risk Factors

| variable | Β | Wald value | P | OR | 95%CI |
| --- | --- | --- | --- | --- | --- |
| Alb | -.102 | 6.21 | 0.012 | 0.903 | (0.833-0.978) |
| LDH | .003 | 5.963 | 0.013 | 1.003 | (1.001-1.005) |
| CRP | .041 | 5.308 | 0.021 | 1.042 | (1.006-1.079) |
| Glucocorticoids (mg/day) | .036 | 10.727 | 0.001 | 1.037 | (1.014-1.059) |
| Cyclophosphamide | 1.011 | 4.081 | 0.043 | 2.748 | (1.031-7.325) |
| Diabetes | 1.827 | 6.899 | 0.009 | 6.191 | (1.590-24.311) |

LDH: lactate dehydrogenase; Alb: albumin; CRP: C-reactive protein.

Table S3 The Variance Inflation Factor for All Factors in The Logistic Regression Analysis Model

|  | B | Sig | VIF |
| --- | --- | --- | --- |
| Diabetes | 0.308 | .001 | 1.042 |
| LDH | 0.000 | .013 | 1.279 |
| Alb | -0.021 | .001 | 1.332 |
| CRP | 0.002 | .009 | 1.152 |
| Glucocorticoids (mg/day) | 0.005 | .009 | 1.332 |
| Cyclophosphamide | 0.163 | .042 | 1.283 |

LDH: lactate dehydrogenase; Alb: albumin; CRP: C-reactive protein;

Figure S1 Receiver operating characteristic (ROC) curves for continuous variables: LDH, ALB, CRP, and glucocorticoids. AUC, area under the curve.
